# Supplementary material for: A single-nucleus transcriptomic atlas of medium spiny neurons in the rat nucleus accumbens
Source: PubMed Central journal article supplement — Sci Rep. 2024 Aug 6;14:18258. doi: 10.1038/s41598-024-69255-0 (PMC11303397; doi:10.1038/s41598-024-69255-0), 2024-08-06
Supplement: 41598_2024_69255_MOESM1_ESM.pdf [file 41598_2024_69255_MOESM1_ESM.pdf]

# **A single-nucleus transcriptomic atlas of medium spiny neurons in the rat nucleus accumbens**

Benjamin C. Reiner<sup>1</sup>, Samar N. Chehimi<sup>1</sup>, Riley Merkel<sup>1,2</sup>, Sylvanus Toikumo<sup>1</sup>, Wade H. Berrettini<sup>1</sup>, Henry R. Kranzler<sup>1,3</sup>, Sandra Sanchez-Roige<sup>4,5,6</sup>, Rachel L. Kember<sup>1,3</sup>, Heath D. Schmidt<sup>1,2,7</sup>, and Richard C. Crist<sup>1,7,8\*</sup>

<sup>1</sup> Department of Psychiatry, Perelman School of Medicine, University of Pennsylvania, Philadelphia, PA, USA

<sup>2</sup> Department of Biobehavioral Health Sciences, School of Nursing, University of Pennsylvania, Philadelphia, PA, USA

<sup>3</sup> Mental Illness Research, Education and Clinical Center, Crescenz VAMC, Philadelphia, PA, USA

<sup>4</sup> Department of Psychiatry, University of California San Diego, La Jolla, California, USA

<sup>5</sup> Department of Medicine, Vanderbilt University Medical Center, Nashville, Tennessee, USA

<sup>6</sup> Institute for Genomic Medicine, University of California San Diego, San Diego, CA, USA

<sup>7</sup> These authors contributed equally to this work

<sup>8</sup> Lead contact

## **Corresponding author:**

Richard C. Crist, Ph.D.

Department of Psychiatry

Perelman School of Medicine

University of Pennsylvania

125 South 31st Street, Room 2207

Philadelphia, PA 19104,

[crist@pennmedicine.upenn.edu](mailto:crist@pennmedicine.upenn.edu)

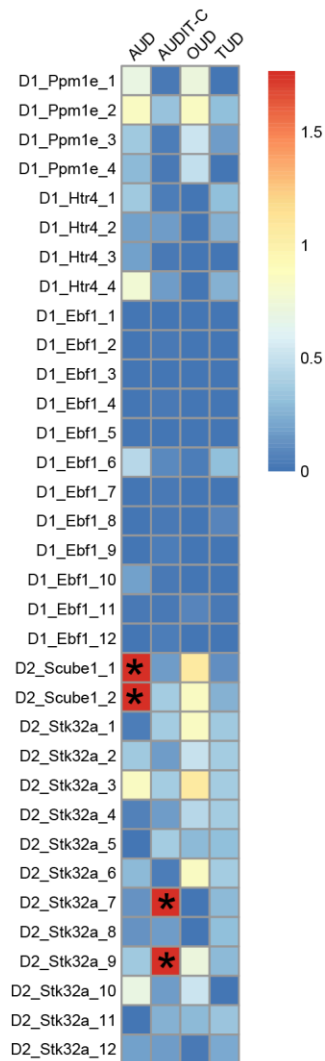

**Supplemental Figure 1: MSN subcluster GWAS enrichment.** Genome-wide association study summary statistics were used to assess MSN subclusters for enriched expression of genes associated with alcohol use disorder (AUD), alcohol consumption (AUDIT-C), opioid use disorder (OUD), and tobacco use disorder (TUD). Heatmap colors indicate the  $-\log_{10}(p\text{-value})$  from Monte Carlo tests after correction for multiple testing with a False Discovery Rate of 0.05. Significant cell type associations are indicated by asterisks.

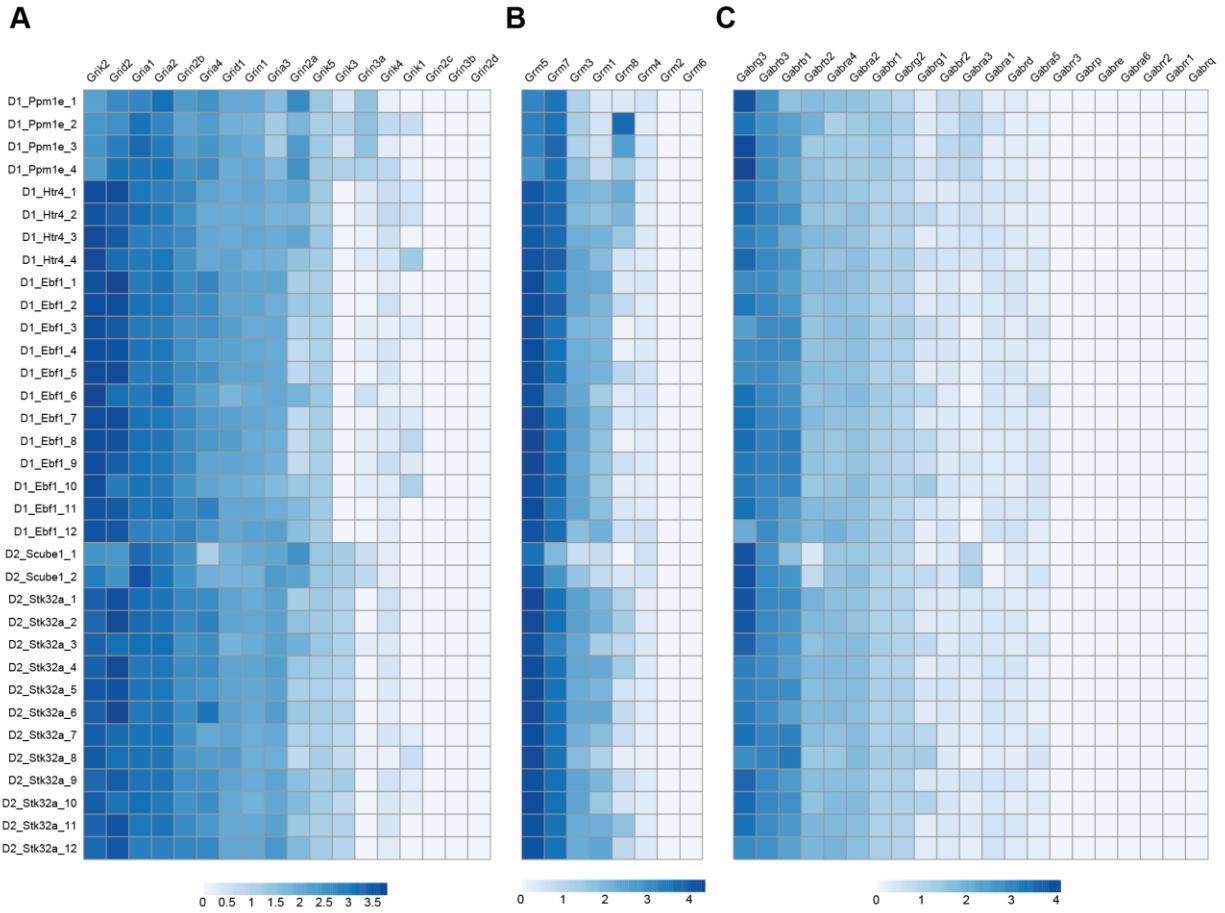

**Supplemental Figure 2: Expression of glutamate and GABA receptor genes in NAc MSN subclusters.** Heatmaps indicate normalized expression of (A) ionotropic and (B) metabotropic glutamate receptor genes and (C) GABA receptor genes in MSN subclusters from the rat NAc. Genes in each panel are sorted from highest to lowest expression average expression.

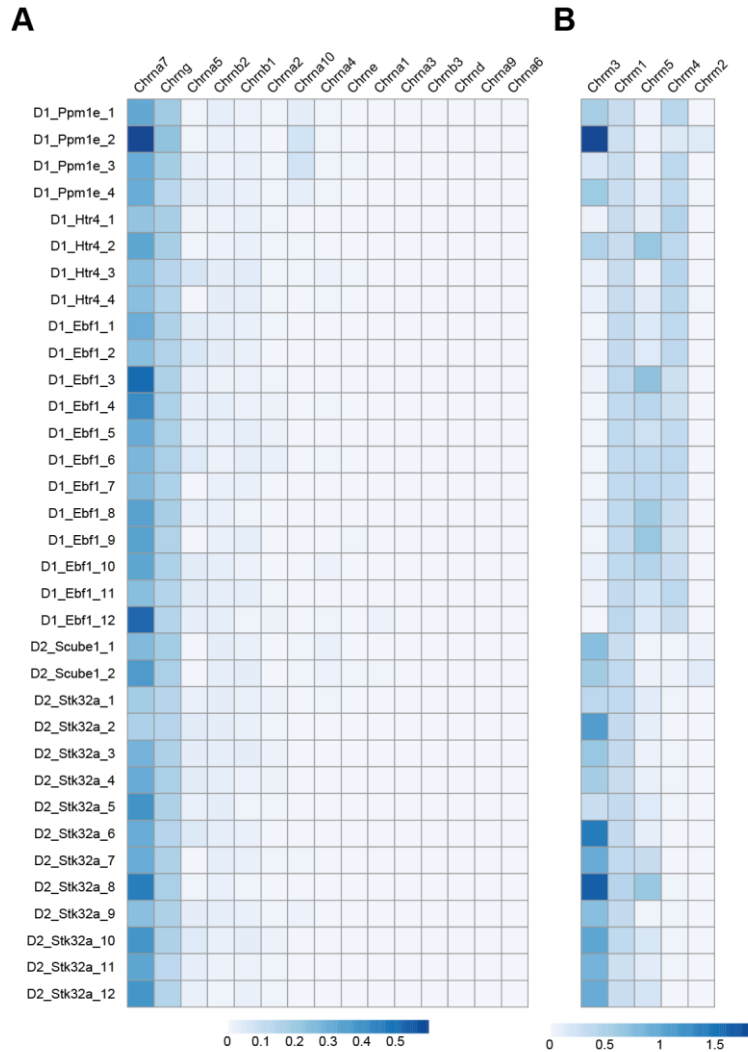

**Supplemental Figure 3: Expression of acetylcholine receptor genes in NAc MSN subclusters.** Heatmaps indicate normalized expression of (A) nicotinic and (B) muscarinic acetylcholine receptor genes in MSN subclusters from the rat NAc. Genes in each panel are sorted from highest to lowest expression average expression.
